# Supplementary material for: Pathway Network Analyses for Autism Reveal Multisystem Involvement, Major Overlaps with Other Diseases and Convergence upon MAPK and Calcium Signaling
Source: PLoS One. 2016 Apr 7;11(4):e0153329. doi: 10.1371/journal.pone.0153329 (PMC4824422; doi:10.1371/journal.pone.0153329)
Supplement: S3 Table — (XLS) [file pone.0153329.s003.xls]

## Sheet: pathway interaction matrix
S3 Table. Pathway-pathway interaction matrix
	Calcium signaling pathway	Neuroactive ligand-receptor interaction	Collection cancer	Long-term potentiation	Melanogenesis	Focal adhesion	Neurotrophin signaling pathway	Gap junction	MAPK signaling pathway	Cell adhesion molecules (CAMs)	Collection cardiac disease	Arrhythmogenic right ventricular cardiomyopathy (ARVC)	Vascular smooth muscle contraction	Regulation of actin cytoskeleton	mTOR signaling pathway	Long-term depression	Renal cell carcinoma	Wnt signaling pathway	Adherens junction	Axon guidance	ErbB signaling pathway	Endocytosis	Ubiquitin mediated proteolysis	Thyroid cancer	Lysine degradation	Type II diabetes mellitus	ECM-receptor interaction	Alzheimer's disease	Tryptophan metabolism	GnRH signaling pathway	Aldosterone-regulated sodium reabsorption	Tyrosine metabolism	Glioma	Phenylalanine metabolism	Leukocyte transendothelial migration	Amyotrophic lateral sclerosis (ALS)	Arginine and proline metabolism	B cell receptor signaling pathway	Huntington's disease	Chemokine signaling pathway	# of interaction		Description	p-value	# ASD genes in pathway
MAPK signaling pathway	1		1	1	1	1	1	1						1	1		1	1	1	1	1			1						1			1			1		1		1	20		MAPK signaling pathway	6.59e-11	22
Calcium signaling pathway			1	1				1	1				1			1					1							1		1			1					1	1		12		Calcium signaling pathway	2.84e-29	35
Collection cancer	1				1	1			1						1			1	1		1						1														9		Collection cancer	2.95e-18	37
Wnt signaling pathway			1		1	1			1			1							1				1	1				1													9		Wnt signaling pathway	5.7e-09	15
Regulation of actin cytoskeleton						1	1		1										1	1															1			1		1	8		Regulation of actin cytoskeleton	2.97e-09	18
Ubiquitin mediated proteolysis							1										1	1													1							1		1	6		Ubiquitin mediated proteolysis	1.11e-07	13
Focal adhesion			1						1					1				1									1														5		Focal adhesion	1.98e-12	21
Adherens junction			1						1					1				1						1																	5		Adherens junction	1.04e-08	11
ErbB signaling pathway	1		1						1						1																		1								5		ErbB signaling pathway	5.07e-08	11
Melanogenesis			1						1									1														1									4		Melanogenesis	1.62e-12	16
Neurotrophin signaling pathway				1					1					1									1																		4		Neurotrophin signaling pathway	4.06e-12	17
Gap junction	1	1							1			1																													4		Gap junction	4.5e-11	14
mTOR signaling pathway			1						1												1												1								4		mTOR signaling pathway	3.16e-09	10
ECM-receptor interaction			1			1					1	1																													4		ECM-receptor interaction	3.66e-07	10
Glioma	1								1						1						1																				4		Glioma	4.21e-06	8
B cell receptor signaling pathway	1								1					1									1																		4		B cell receptor signaling pathway	1.24e-05	8
Chemokine signaling pathway									1					1									1												1						4		Chemokine signaling pathway	2.19e-05	12
Long-term potentiation	1						1		1																																3		Long-term potentiation	1.46e-16	17
Arrhythmogenic right ventricular cardiomyopathy (ARVC)								1										1									1														3		Arrhythmogenic right ventricular cardiomyopathy (ARVC)	9.21e-10	12
Thyroid cancer									1									1	1																						3		Thyroid cancer	1.43e-07	7
GnRH signaling pathway	1	1							1																																3		GnRH signaling pathway	2.05e-06	10
Leukocyte transendothelial migration										1				1																										1	3		Leukocyte transendothelial migration	8.35e-06	10
Neuroactive ligand-receptor interaction								1																						1											2		Neuroactive ligand-receptor interaction	2.87e-29	41
Renal cell carcinoma									1														1																		2		Renal cell carcinoma	4.88e-09	11
Axon guidance									1					1																											2		Axon guidance	4.96e-08	13
Alzheimer's disease	1																	1																							2		Alzheimer's disease	1.15e-06	13
Tyrosine metabolism					1																													1							2		Tyrosine metabolism	2.11e-06	7
Cell adhesion molecules (CAMs)																																			1						1		Cell adhesion molecules (CAMs)	1.14e-10	16
Collection cardiac disease																											1														1		Collection cardiac disease	7.64e-10	13
Vascular smooth muscle contraction	1																																								1		Vascular smooth muscle contraction	1.28e-09	14
Long-term depression	1																																								1		Long-term depression	4.88e-09	11
Lysine degradation																																					1				1		Lysine degradation	1.93e-07	8
Aldosterone-regulated sodium reabsorption																							1																		1		Aldosterone-regulated sodium reabsorption	2.11e-06	7
Phenylalanine metabolism																																1									1		Phenylalanine metabolism	4.38e-06	5
Amyotrophic lateral sclerosis (ALS)									1																																1		Amyotrophic lateral sclerosis (ALS)	1.05e-05	7
Arginine and proline metabolism																									1																1		Arginine and proline metabolism	1.19e-05	7
Huntington's disease	1																																								1		Huntington's disease	1.68e-05	12
Endocytosis																																									0		Endocytosis	7.61e-08	15
Type II diabetes mellitus																																									0		Type II diabetes mellitus	3.29e-07	8
Tryptophan metabolism																																									0		Tryptophan metabolism	1.49e-06	7
	12	2	9	3	4	5	4	4	20	1	1	3	1	8	4	1	2	9	5	2	5	0	6	3	1	0	4	2	0	3	1	2	4	1	3	1	1	4	1	4
